# Supplementary material for: Unveiling the Potentiality of Shikonin Derivatives Inhibiting SARS-CoV-2 Main Protease by Molecular Dynamic Simulation Studies
Source: MDPI journal article supplement (doi:10.3390/ijms24043100), 2023-02-04
Supplement: s1 [file s1]

## Supplementary Data

### Unveiling the potentiality of Shikonin Derivatives inhibiting SARS-CoV-2 main protease

**Table S1:** List of Shikonin derivatives according to different SAR modifications.

| Compound name                            | IUPAC Name                                                                                                                   | Structure                                                                             | Binding affinity (kcal/mol) |
|------------------------------------------|------------------------------------------------------------------------------------------------------------------------------|---------------------------------------------------------------------------------------|-----------------------------|
| 1,4-napthoquinone                        | Naphthalene-1,4-dione                                                                                                        |    | -3.853                      |
| Acetylshikonin                           | [(1 <i>R</i> )-1-(5,8-dihydroxy-1,4-dioxonaphthalen-2-yl)-4-methylpent-3-enyl] acetate                                       |    | -5.838                      |
| Isobutyrylshikonin                       | [1-(5,8-dihydroxy-1,4-dioxonaphthalen-2-yl)-4-methylpent-3-enyl]2-methylpropanoate                                           |    | -5.957                      |
| Angelylshikonin                          | [4-methyl-1-(1,4,5,8-tetrahydroxy-2-naphthyl)penta-1,3-dienyl] 2-methylbut-2-enoate                                          |  | -5.974                      |
| 3,4-methylenedioxyphenyl acetyl shikonin | 1-(1,3-benzodioxol-5-yl)ethanone                                                                                             |  | -4.707                      |
| 4-chlorophenylacetyl shikonin            | 3-[2-(4-chlorophenyl)acetyl]-5,8-dihydroxy-3-[(1 <i>R</i> )-1-hydroxy-4-methylpent-3-enyl]-2 <i>H</i> -naphthalene-1,4-dione |  | -5.747                      |
| Acryloyl shikonin                        | 5,8-dihydroxy-2-[(1 <i>R</i> )-1-hydroxy-4-methyl-pent-3-enyl]-2-prop-2-enoyl-tetralin-1,4-dione;ethane                      |  | -5.733                      |
| Alpha-methylbutyryl shikonin             | 5,8-dihydroxy-3-[(1 <i>R</i> )-1-hydroxy-4-methylpent-3-enyl]-3-(2-methylbutanoyl)-2 <i>H</i> -naphthalene-1,4-dione         |  | -3.829                      |
| Alpha-methyl-n-butyl shikonin            | 3-butyl-5,8-dihydroxy-3-[(1 <i>R</i> )-1-hydroxy-4-methylpent-3-enyl]-2-methyl-2 <i>H</i> -naphthalene-1,4-dione             |  | -5.986                      |

|                                  |                                                                                                               |  |         |
|----------------------------------|---------------------------------------------------------------------------------------------------------------|--|---------|
| Arnebinone                       | 8-ethenyl-2,3-dimethoxy-8-methyl-5-prop-1-en-2-yl-6,7-dihydro-5 <i>H</i> -naphthalene-1,4-dione               |  | -4.342, |
| Beta-beta-dimethylacryl shikonin | [(1 <i>R</i> )-1-(5,8-dihydroxy-1,4-dioxonaphthalen-2-yl)-4-methylpent-3-enyl] 3-methylbut-2-enoate           |  | -5.641  |
| Beta-Hydroxyisovaleryl shikonin  | [(1 <i>R</i> )-1-(5,8-dihydroxy-1,4-dioxonaphthalen-2-yl)-4-methylpent-3-enyl] 3-hydroxy-3-methylbutanoate    |  | -5.628  |
| Deoxyshikonin                    | 5,8-dihydroxy-2-(4-methylpent-3-enyl)naphthalene-1,4-dione                                                    |  | -6.179  |
| Lithospermidin-B                 | [( <i>E</i> )-1-(1,4-dihydroxy-5,8-dioxonaphthalen-2-yl)-4-hydroxy-4-methylpent-2-enyl] 3-methylbutanoate     |  | -6.005  |
| Propionyl shikonin               | [(1 <i>R</i> )-1-(5,8-dihydroxy-1,4-dioxonaphthalen-2-yl)-4-methylpent-3-enyl] propanoate                     |  | -3.153  |
| Shikonin                         | 5,8-dihydroxy-2-[(1 <i>R</i> )-1-hydroxy-4-methylpent-3-enyl]naphthalene-1,4-dione                            |  | -2.954  |
| Shikonin acetate                 | 5,8-dihydroxy-2-[(1 <i>R</i> )-1-hydroxy-4-methylpent-3-enyl]-1,4-dioxo-3 <i>H</i> -naphthalen-2-yl] acetate  |  | -5.823  |
| Shikonin glucoside               | 5,8-dihydroxy-2-[4-methyl-1-[3,4,5-trihydroxy-6-(hydroxymethyl)oxan-2-yl]oxypent-3-enyl]naphthalene-1,4-dione |  | -8.079  |
| Shikonin leucoacetate            | [4,5,8-triacetyloxy-6-(1-acetyloxy-4-methylpent-3-enyl)naphthalen-1-yl] acetate                               |  | -4.230  |
| Teracrylshikonin                 | [(1 <i>R</i> )-1-(5,8-dihydroxy-1,4-dioxonaphthalen-2-yl)-4-methylpent-3-enyl] 3,4-dimethylpent-3-enoate      |  | -5.337  |

**Table S2:** Docking and binding free energy result of the selected compounds.

| Compound Name                      | Docking score<br>(kcal mol <sup>-1</sup> ) | MM-GBSA<br>(kcal mol <sup>-1</sup> ) | MM-GBSA<br>(kcal mol <sup>-1</sup> ) |
|------------------------------------|--------------------------------------------|--------------------------------------|--------------------------------------|
| Shikonin                           | -6.029                                     | -26.96                               | -35.58                               |
| Shikonin Glucoside                 | -8.079                                     | -53.026                              | -22.69                               |
| Lithospermidin-B                   | -6.094                                     | -44.299                              | -36.52                               |
| Alpha methyl butyl shikonin        | -5.631                                     | -45.145                              | -35.33                               |
| Beta-hydroxyisovaleryl<br>shikonin | -6.822                                     | -45.145                              | -37.95                               |

**Table S3:** Vital ADMET parameters

| Attributes                                                                     | Values                       |
|--------------------------------------------------------------------------------|------------------------------|
| Molecular weight (MW)                                                          | <500                         |
| Hydrogen bond donors (HBD)                                                     | ≤ 5                          |
| Hydrogen bond acceptors (HBA)                                                  | ≤ 10                         |
| Predicted brain/blood partition coefficient (QPlog BB)                         | -3.0 to 1.2                  |
| Predicted IC50 value for blockage of HERG K <sup>+</sup> channels (QPlog herg) | < -5                         |
| Human oral absorption (HOA)                                                    | 3=higher, 2= medium, 1=lower |
| Predicted apparent MDCK cell permeability in nm/sec (QPlog mdck)               | <25 poor,<br>>500 great      |

**Table S4:** ADMET results of selected compounds

| ADMET properties | Shikonin Glucoside | Beta-hydroxyisovaleryl shikonin | Lithospermidin-B | Alpha-methyl-n-butyl shikonin | Shikonin |
|------------------|--------------------|---------------------------------|------------------|-------------------------------|----------|
| MW               | 450.441            | 390.432                         | 388.416          | 360.449                       | 288.299  |
| HBD              | 4                  | 1                               | 1                | 0                             | 0        |
| HBA              | 13.7               | 6.95                            | 5.25             | 4.2                           | 4.2      |
| QPlogPo/w        | -0.341             | 2.714                           | 3.08             | 3.948                         | 2.123    |
| QPlogS           | -3.588             | -4.841                          | -5.211           | -5.249                        | -3.409   |
| QPPCaco          | 11.541             | 293.637                         | 66.408           | 546.005                       | 120.678  |

|           |         |         |         |         |         |
|-----------|---------|---------|---------|---------|---------|
| QPlogBB   | -3.293  | -1.54   | -2.36   | -1.205  | -1.68   |
| HOA       | 1       | 3       | 3       | 3       | 3       |
| SASA      | 711.333 | 633.394 | 702.049 | 624.029 | 547.115 |
| FOSA      | 262.462 | 369.66  | 356.07  | 381.291 | 203.637 |
| QPpolrz   | 39.639  | 35.096  | 39.378  | 35.05   | 28.791  |
| QPlogPC16 | 14.417  | 11.151  | 12.572  | 10.606  | 9.283   |
| QPlogPoct | 26.381  | 16.618  | 18.175  | 13.593  | 11.917  |
| CIQPlogS  | -3.588  | -4.841  | -5.211  | -5.249  | -3.847  |
| QPlogHERG | -5.251  | -4.51   | -5.306  | -4.491  | -4.706  |
| QPPMDCK   | 3.98    | 131.558 | 26.382  | 257.212 | 50.315  |
| QPlogKp   | -5.577  | -3.3168 | -4.4469 | -2.714  | -4.051  |
| QPlogKhsa | -0.84   | 0.012   | 0.407   | 0.444   | -0.044  |
| #metab    | 10      | 9       | 5       | 7       | 6       |

**Table S5:** Binding site analysis of Shikonin and selected top hits.

| Compound Name                      | Hydrogen bonds<br>(Distance in Å) | Hydrophobic bonds<br>(Distance in Å) | $\pi$ stacking           |
|------------------------------------|-----------------------------------|--------------------------------------|--------------------------|
| Beta-hydroxyisovaleryl<br>shikonin | His <sup>164</sup> (1.91)         | Met <sup>165</sup> (3.88)            | His <sup>41</sup> (4.14) |
|                                    | Glu <sup>166</sup> (2.26)         |                                      |                          |
|                                    | Glu <sup>166</sup> (2.99)         |                                      |                          |
|                                    | Glu <sup>166</sup> (1.98)         | Gln <sup>189</sup> (3.87 )           |                          |
|                                    | Asp <sup>187</sup> (3.26)         |                                      |                          |
|                                    |                                   |                                      |                          |
| Shikonin                           | Arg <sup>188</sup> (3.04)         | Met <sup>165</sup> (3.78)            | His <sup>41</sup> (3.94) |
|                                    |                                   | Glu <sup>166</sup> (3.71)            |                          |
|                                    |                                   | Asp <sup>187</sup> (3.70)            |                          |
| Alpha-methyl-n-<br>butyl_shikonin  | Arg <sup>188</sup> (3.42)         | His <sup>41</sup> (3.30)             |                          |
|                                    |                                   | Met <sup>49</sup> (3.82)             |                          |
|                                    | Arg <sup>188</sup> (2.59)         | Leu <sup>167</sup> (3.98)            |                          |
|                                    |                                   | Gln <sup>189</sup> (3.71)            |                          |
|                                    |                                   | Gln <sup>192</sup> (3.78)            |                          |
|                                    |                                   |                                      |                          |
| Lithospermidin-B                   | Thr <sup>190</sup> (3.19)         | His <sup>41</sup> (3.17)             |                          |
|                                    | Thr <sup>190</sup> (2.25)         | Met <sup>49</sup> (3.84)             |                          |
|                                    | Gln <sup>192</sup> (1.83)         | Leu <sup>167</sup> (3.78)            |                          |
| Shikonin_glucoside                 | Glu <sup>166</sup> (2.06)         | His <sup>41</sup> (3.24)             | His <sup>41</sup> (3.48) |
|                                    | Glu <sup>166</sup> (2.16)         | Met <sup>49</sup> (3.47)             |                          |
|                                    | Thr <sup>190</sup> (2.07)         | Met <sup>165</sup> (3.95)            |                          |
|                                    | Thr <sup>190</sup> (3.16)         | Gln <sup>189</sup> (3.45)            |                          |
|                                    | Gln <sup>192</sup> (2.24)         |                                      |                          |

**A.**

**a.**

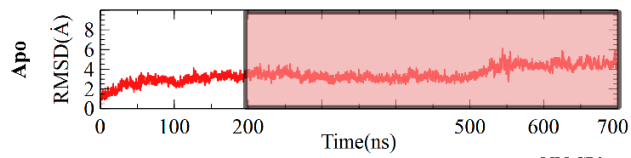

**b.**

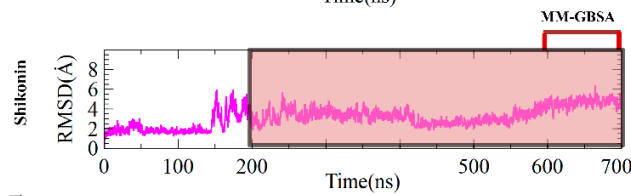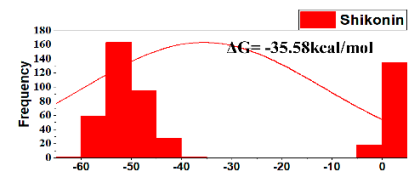

**c.**

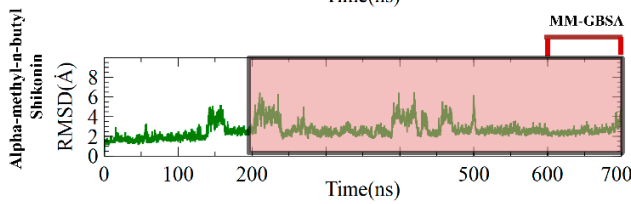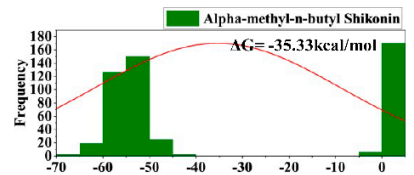

**d.**

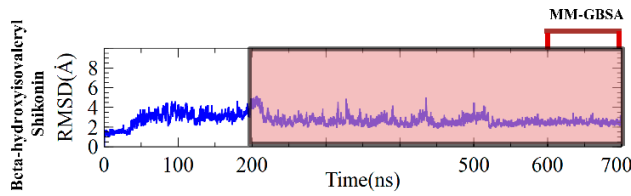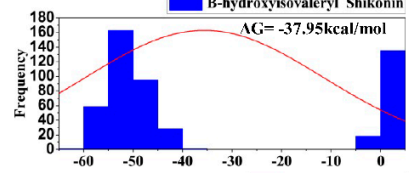

**e.**

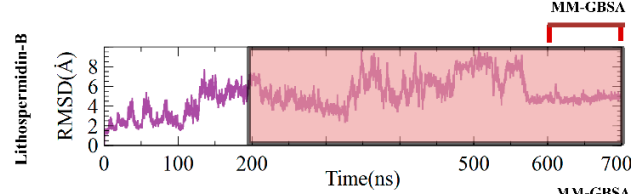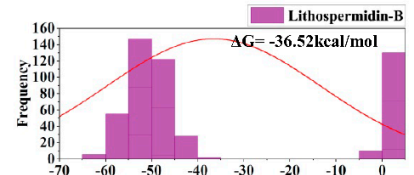

**f.**

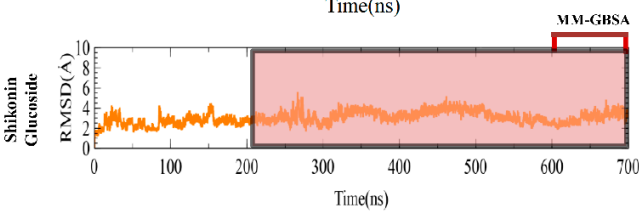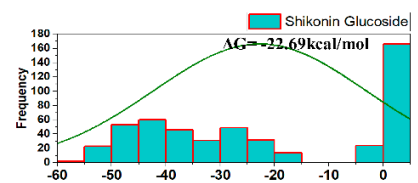

## B.

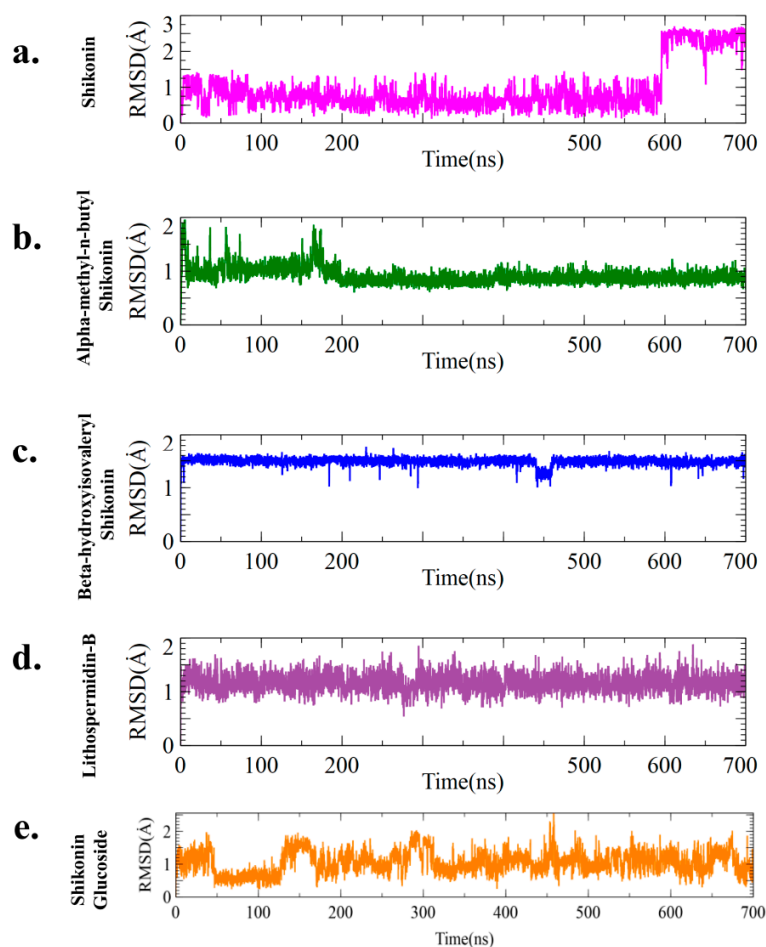

**Figure S1:** Time evolution of root-mean-square deviations (RMSDs). **A)** Protein RMSD for a) Apo, b) Shikonin, c) Alpha-methyl-n-butyl Shikonin., d) Beta-hydroxyisovaleryl Shikonin, e) Lithospermidin-B, f) Shikonin Glucoside **B)** Ligand RMSD for a) Shikonin, b) Alpha-methyl-n-butyl Shikonin., c) Beta-hydroxyisovaleryl Shikonin, d) Lithospermidin-B, e) Shikonin Glucoside.
